# Supplementary material for: Assessing the Impact of Prophylactic Eculizumab on Renal Graft Survival in Atypical Hemolytic Uremic Syndrome
Source: PubMed Central journal article supplement (PMC10065821; doi:10.1097/tp.0000000000004355), 2023-03-31
Supplement: tp-107-994-s002.pdf [file tp-107-994-s002.pdf]

## SUPPLEMENTARY TABLES

**Table S1. Inclusion and exclusion criteria for diagnosis of aHUS**

| Inclusion criteria                                                                                                                   | Exclusion criteria                                             | Tests for exclusion criteria                                                                         |
|--------------------------------------------------------------------------------------------------------------------------------------|----------------------------------------------------------------|------------------------------------------------------------------------------------------------------|
| Triad of microangiopathic haemolytic anaemia, thrombocytopenia and acute kidney injury<br><br>AND/OR<br><br>Renal biopsy showing TMA | TTP                                                            | ADAMTS13 >5%                                                                                         |
|                                                                                                                                      | Shiga toxin associated HUS*                                    | Stool culture<br>PCR for STEC virulence genes in stool<br>Serology                                   |
|                                                                                                                                      | Drug-induced TMA                                               |                                                                                                      |
|                                                                                                                                      | Infection (HIV, Streptococcus pneumonia)                       | HIV<br>T antigen<br>Urinary pneumococcal antigen                                                     |
|                                                                                                                                      | Transplantation (bone marrow, liver, lung, cardiac)            |                                                                                                      |
|                                                                                                                                      | Cobalamin deficiency                                           | Plasma homocysteine levels<br>Plasma and urine methylmalonic acid levels<br>MMACHC variant screening |
|                                                                                                                                      | Systemic lupus erythematosus                                   | dsDNA                                                                                                |
|                                                                                                                                      | Antiphospholipid antibody syndrome                             | Antiphospholipid antibodies                                                                          |
|                                                                                                                                      | Scleroderma                                                    | Antinuclear antibodies<br>Anti-centromere antibodies<br>Anti-scl-70                                  |
|                                                                                                                                      | Glucose 6 Phosphate Dehydrogenase (G6PD) deficiency            | G6PD activity                                                                                        |
|                                                                                                                                      | Evidence of consumptive coagulopathy                           | Coagulation Screen Fibrinogen                                                                        |
|                                                                                                                                      | Malignant hypertension                                         | Electrocardiogram<br>Echocardiogram                                                                  |
|                                                                                                                                      | Plasma cell dyscrasias                                         | Serum/urine electrophoresis<br>Serum free light chains                                               |
|                                                                                                                                      | Pregnancy with evidence of preeclampsia, HELLP syndrome or TTP | Pregnancy test                                                                                       |

The presence of a positive results in a test used to identify an exclusion criteria would go against the diagnosis of aHUS. \*Unless a confirmed disease-associated genetic variant was also identified (positive for STEC in n=3, all in prophylactic treatment cohort #93, 321,

387). TMA, thrombotic microangiopathy; TTP, thrombotic thrombocytopenic purpura

**Table S2. Group specific data collection.**

| <b>Control cohort</b>                                                              | <b>Prophylactic Treatment Cohort</b>                                                                                                                                                                                              |
|------------------------------------------------------------------------------------|-----------------------------------------------------------------------------------------------------------------------------------------------------------------------------------------------------------------------------------|
| Native and transplant renal biopsy results<br>Donor type<br>Use of plasma exchange | Native and transplant renal biopsy results<br>Donor type<br>Mismatch<br>Use of plasma exchange<br>Immunosuppression<br>Serum creatinine and eGFR at 1 year<br>Reason for eculizumab cessation<br>Meningococcal vaccination timing |

Data collected from medical records, where available, for control and prophylactic eculizumab treatment cohorts in addition to the data collected for transplants and recipients from all groups.

**Table S3-A: *MMACHC* primers.** DMSO used in exon 1

| exon | forward primer sequence | reverse primer sequence |
|------|-------------------------|-------------------------|
| 1    | GAACTACGCATCCCAAGATGC   | GTCACATGGACACTGGGCTG    |
| 2    | CAAAAGTGTGAGGCCTGAAG    | ACCTTTGAAGTGGCTCCTAG    |
| 3    | ACCATGCCTTCCTTCACACC    | CACCACTAGTCTTAACACTGC   |
| 4A   | GGAAGTGAACAGGCCTAGC     | TAGGCTTCTCTGAGGGCTG     |
| 4B   | ACTTACCGGGATGCTGTGAC    | CCTGGCCTTTATCTTGGCC     |

**Table S3-B: *THBD* primers.** Betaine used in all amplicons

| exon | forward primer sequence | reverse primer sequence |
|------|-------------------------|-------------------------|
| 1A   | CTGTGCCCTCTGCTCC        | TGGTGTTGTTGTCTCCCGTA    |
| 1B   | TCATTTCTTGCTACTGAACG    | CACGCTGCAGTCCCAAG       |
| 1C   | GCTCCCCTCGGCTTACAG      | CGTCCACCAGGTCGTAGTTAG   |
| 1D   | ATACTGGAGCCCAGTCCGTG    | GTCACAGTCGGTGCCAATG     |
| 1E   | GCACGGACATCGACGAG       | TTTGGTAGCAAAGCTGGGG     |

**Table S3-C: *VTN* primers.** DMSO used in exon 1-2

| exon | forward primer sequence | reverse primer sequence |
|------|-------------------------|-------------------------|
| 1-2  | CTTCTCCAGTGCCCTCCTTC    | CATAGTGAACACATCCCCGC    |
| 3    | AAGGTGTGTTTCAGAGCCCAG   | GGAGGAGATGGTGTGAGAGC    |
| 4    | AAGAACGGTTCCTCTTTGC     | CCTGGAGTCTTGGGGCTG      |
| 5    | AGTGAACCTGGACCTGGG      | CCAGAGGCTGTTGAAGTTAGG   |
| 6    | AGATCCTAACTTCAACAGCCTCT | TCGATAGCTCCACAACCACA    |
| 7    | GGGGAAGGGAATTGGACTGA    | CTGTGGTCACTACTTGCAGG    |
| 8    | GTTTTCTTGCTGTCCCTGG     | TTAAACTCGGGGCTAAGGGA    |

Genomic DNA was prepared from peripheral blood according to standard procedures.

Genomic DNA was amplified by PCR using intronic oligonucleotides for MMACHC (Table 2A), THBD (Table 2B) and VTN (Table 2C). The PCR cycling conditions were: 1 cycle of: 95°C for 5 min; 32 cycles (94°C for 1 min, 60°C for 1 min, 72°C for 1 min); 1 cycle of: 72°C for 5 min for all amplicons with the exception of THBD amplicons 1B – 1E where an annealing temp of 55°C was used. All primers contained a tag for sequencing (Tag for forward primer – GTAGCGCGACGGCCAGT; Tag for reverse primer – CAGGGCGCAGCGATGAC ).

Mutation screening was carried out by fluorescent sequencing (ABI) and analysis using Mutation Surveyor software (v4.0.8).

**Table S4. Graft outcome in cohort not treated with eculizumab.**

|                               | Complement defect                                                                                                      |                                                                                                |            |                                                                       |                                 |                     |
|-------------------------------|------------------------------------------------------------------------------------------------------------------------|------------------------------------------------------------------------------------------------|------------|-----------------------------------------------------------------------|---------------------------------|---------------------|
|                               | VUS<br>n=12                                                                                                            | Pathological variant                                                                           |            |                                                                       |                                 | anti -<br>FH<br>n=5 |
|                               |                                                                                                                        | CFH<br>n=43                                                                                    | CFI<br>n=5 | C3<br>n=11                                                            | CD46<br>n=4                     |                     |
| <b>Graft status</b>           |                                                                                                                        |                                                                                                |            |                                                                       |                                 |                     |
| Functioning                   | 2                                                                                                                      | 9                                                                                              | 1          | 2                                                                     | 3                               | 2                   |
| Failed                        | 10                                                                                                                     | 34                                                                                             | 4          | 9                                                                     | 1                               | 3                   |
| <b>Cause of graft failure</b> |                                                                                                                        |                                                                                                |            |                                                                       |                                 |                     |
| post-transplant TMA           | 4                                                                                                                      | 27                                                                                             | 3          | 7                                                                     | 0                               | 0                   |
| Rejection                     | 2                                                                                                                      | 1                                                                                              | 1          | 1                                                                     | 0                               | 3                   |
| Other                         | 4<br>chronic allograft dysfunction, unclear cause despite investigation, non-viable infarcted kidney, graft thrombosis | 2<br>transplant glomerulopathy, cortical rupture, 4 where cause of graft failure not available | 0          | 1<br>severe chronic tubule-interstitial damage and possible infection | 1<br>hypertensive donor disease | 0                   |

Kidney graft outcome in those with atypical haemolytic uraemic syndrome (aHUS) not treated with eculizumab for duration of graft. If the graft failed, cause of graft failure is given where known.

Transplants are grouped by complement defect in recipient by detection of variant of uncertain significance (VUS) or presence of pathological variant in complement factor H (CFH), complement factor I (CFI), C3 or membrane cofactor protein (CD46) genes, or presence of autoantibodies to factor H (anti-FH). If autoantibodies to factor H were detected concomitantly with a genetic variant, the group was assigned as anti-FH if it was VUS but by the affected gene instead if it was a pathological variant. Therefore, two grafts are grouped by pathological CFH variants when recipients also had anti-FH antibodies detected and 3 grafts in recipients with VUS are grouped as anti-FH due to detection of antibodies. No recipients had identified pathological variants in non-complement pathway genes

associated with aHUS. Number (n) of grafts in each group is detailed. TMA, thrombotic microangiopathy

## **SUPPLEMENTARY FIGURES**

### **Figure S1. Death-censored renal graft survival without eculizumab treatment by year of transplantation.**

Kaplan Meier analysis of graft survival in those at medium and high risk of atypical haemolytic uraemic syndrome recurrence who did not receive eculizumab treatment. Grafts are grouped by year of transplantation to examine for era effect. Survival is censored for patient death with a functioning graft and for functioning graft at last follow up. Numbers at risk in each group at 12 monthly time points are detailed below the graph.



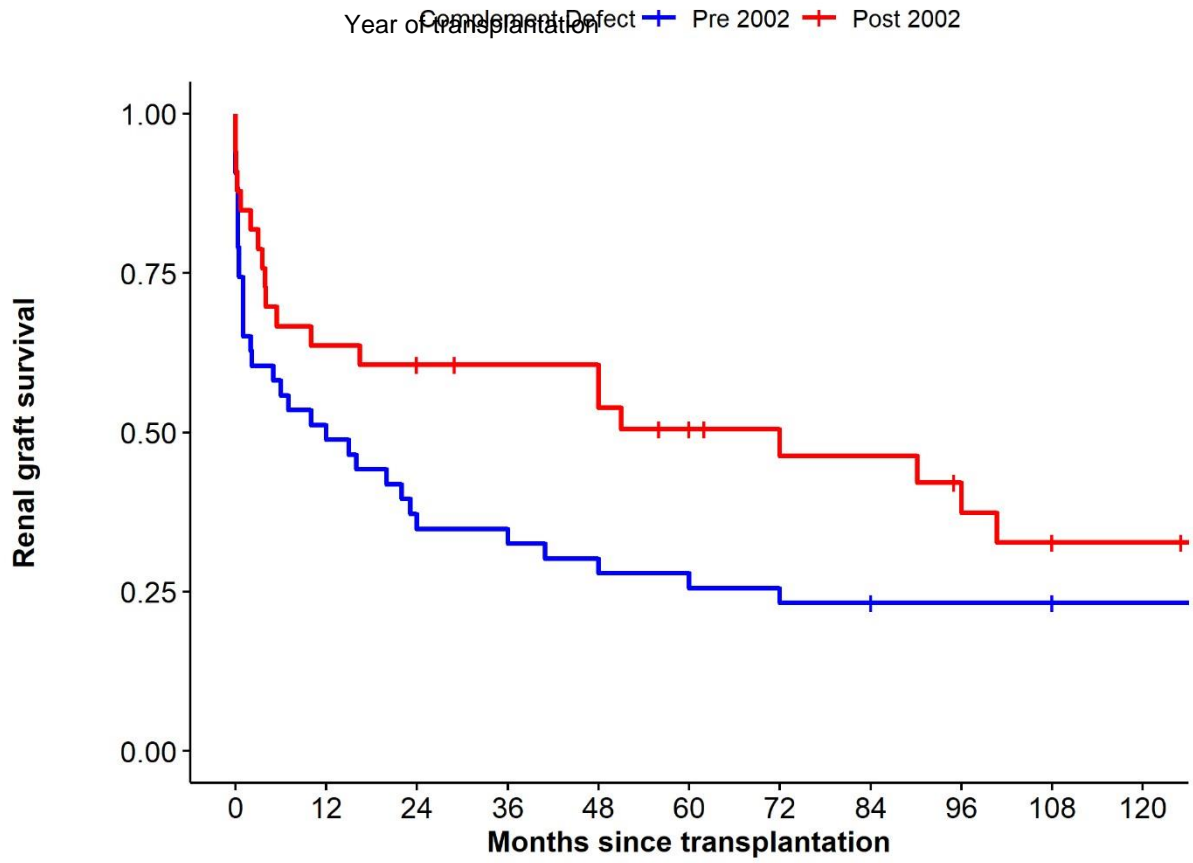

**Number at risk**

|           | 0  | 12 | 24 | 36 | 48 | 60 | 72 | 84 | 96 | 108 | 120 |
|-----------|----|----|----|----|----|----|----|----|----|-----|-----|
| Pre 2002  | 43 | 22 | 16 | 15 | 13 | 12 | 11 | 10 | 9  | 9   | 8   |
| Post 2002 | 33 | 21 | 20 | 18 | 18 | 14 | 12 | 11 | 9  | 7   | 6   |

Months since transplantation
